# Supplementary material for: In Search of Monocot Phosphodiesterases: Identification of a Calmodulin Stimulated Phosphodiesterase from Brachypodium distachyon
Source: MDPI journal article supplement (doi:10.3390/ijms22179654), 2021-09-06
Supplement: s1 [file s1]

**Supplementary Information**

**In Search of Monocot Phosphodiesterases: *Identification of a Calmodulin Stimulated Phosphodiesterase from *Brachypodium distachyon****

Mateusz Kwiatkowski<sup>1\*</sup>, Aloysius Wong<sup>2,3</sup>, Anna Kozakiewicz-Piekarz<sup>4</sup>, Christoph Gehring<sup>5</sup>, Krzysztof Jaworski<sup>1</sup>

<sup>1</sup> Chair of Plant Physiology and Biotechnology, Nicolaus Copernicus University, Lwowska St. 1, 87-100 Torun, Poland

<sup>2</sup> Department of Biology, College of Science and Technology, Wenzhou-Kean University, 88 Daxue Road, Ouhai, Wenzhou, Zhejiang Province 325060, China

<sup>3</sup> Zhejiang Bioinformatics International Science and Technology Cooperation Center of Wenzhou-Kean University

<sup>4</sup> Department of Biomedical and Polymer Chemistry, Faculty of Chemistry, Nicolaus Copernicus University, Gagarina St. 7, 87-100 Torun, Poland

<sup>5</sup> Department of Chemistry, Biology and Biotechnology, University of Perugia, Borgo XX giugno, 74, 06121 Perugia, Italy

\*Corresponding author: Tel: +48-56-611-44-56; Fax: +48-56-61-14-772; E-mail: m.kwiatkowski@doktorant.umk.pl

**Supplementary Information contains 2 figures, 1 table and supplementary methods**

Supplementary Figure S1

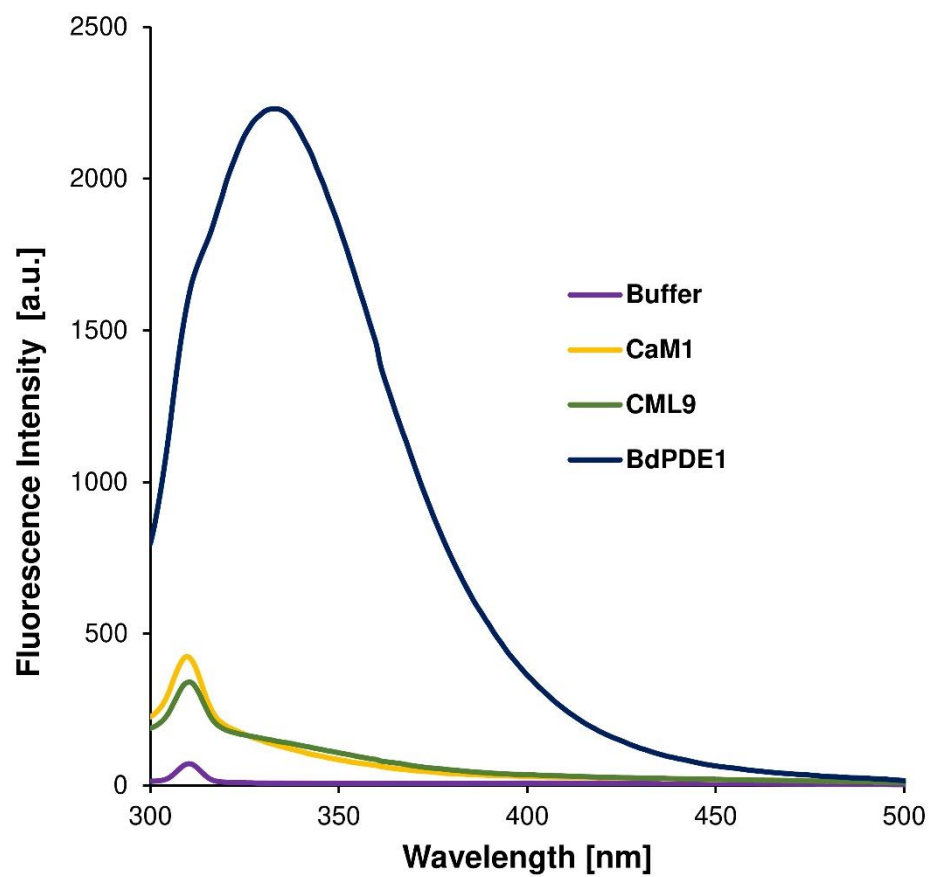

Emission spectra of 0.5  $\mu$ M BDPDE1, 10 mM glutathione in 50 mM Tris-HCl (pH 9.0), 0.5  $\mu$ M CaM1 and 0.5  $\mu$ M CML9.

### Supplementary Figure S2

## A

|        |                                                             |     |
|--------|-------------------------------------------------------------|-----|
| AtCaM1 | MADQLTDEQISEFKEAFSLFDKDGDCITTKELGTVMRSLGQNPTAEALQDMINEVDADG | 60  |
| BdCaM1 | MADQLTDEQIAEFKEAFSLFDKDGDCITTKELGTVMRSLGQNPTAEALQDMINEVDADG | 60  |
|        | *****:*****                                                 |     |
| AtCaM1 | NGTIDFPEFLNLMAKMKDSTDSEELKEAFRVFDKQNGFISAAELRHVMTNLGEKLTDE  | 120 |
| BdCaM1 | NGTIDFPEFLNLMARKMKDSTDSEELKEAFRVFDKQNGFISAAELRHVMTNLGEKLTDE | 120 |
|        | *****:*****                                                 |     |
| AtCaM1 | EVEEMIREADVDDGQINYEYEFVKIMMAK                               | 149 |
| BdCaM1 | EVDEMIREADVDDGQINYEYEFVKVMMMAK                              | 149 |
|        | *****.*****                                                 |     |

# B

|        |                                                                            |     |
|--------|----------------------------------------------------------------------------|-----|
| AtCaM3 | MADQLTDDQIAEFKEAFSLFDKDGDCITTKELGTVMRSLGQNPTAEALQDMINEVDADG                | 60  |
| BdCaM3 | MADQLTDDQIAEFKEAFSLFDKDGDCITTKELGTVMRSLGQNPTAEALQDMINEVDADG<br>*****:***** | 60  |
| AtCaM3 | NGTIDFPEFLNLMARKMKDTSSEELKEAFRVFDKQNGFISAAELRHVMTNLGEKLDE                  | 120 |
| BdCaM3 | NGTIDFPEFLNLMARKMKDTSSEELKEAFRVFDKQNGFISAAELRHVMTNLGEKLDE<br>*****         | 120 |
| AtCaM3 | EVDEMIKEADVDDGQINYEDEFVKVMMAK                                              | 149 |
| BdCaM3 | EVDEMVREADVDDGQINYEDEFVKVMMAK<br>*****.*****                               | 149 |

## C

|        |                                                             |     |
|--------|-------------------------------------------------------------|-----|
| AtCaM7 | MADQLTDDQISEFKEAFSLFDKDGDCITTKELGTVMRSLGQNPTAEALQDMINEVDADG | 60  |
| BdCaM7 | MADQLTDDQIAEFKEAFSLFDKDGDCITTKELGTVMRSLGQNPTAEALQDMINEVDADG | 60  |
|        | *****:*****                                                 |     |
| AtCaM7 | NGTIDFPEFLNLMARKMKDTSSEELKEAFRVFDKQNGFISAAELRHVMTNLGEKLTDE  | 120 |
| BdCaM7 | NGTIDFPEFLNLMARKMKDTSSEELKEAFRVFDKQNGFISAAELRHVMTNLGEKLTDE  | 120 |
|        | *****                                                       |     |
| AtCaM7 | EVDEMIREADVDDGQINYEETFVKVMMAK                               | 149 |
| BdCaM7 | EVDEMIREADVDDGQINYEETFVKVMMAK                               | 149 |
|        | *****                                                       |     |

## D

|        |                                                                 |     |
|--------|-----------------------------------------------------------------|-----|
| AtCaM1 | MADQLTDEQISEFKEAFSLFDKDGDCITTKELGTVMRSLGQNPTAEALQDMINEVDADG     | 60  |
| AtCML9 | MADAFTDEQIQEFYEAFCLIDKSDSGFITKEKLTKVMKSMGKNPKAEQLQQMMSDVIDFG    | 60  |
|        | *** :*****.* ** *.*:***.* **.:*: ***:*:*:**.:**:*:.* ** *       |     |
| AtCaM1 | NGTIDFPEFLNLMAKKMKDSTDSEELKEAFRVFDKDGNGFISAAELRHVMTNLGEKLTDE    | 120 |
| AtCML9 | NGGTFDDFLYIMAQNTSQESASDELIEVFRVFDKDGGLISQLELGEGMKDMGMKITAEE     | 120 |
|        | ** * * :** :***.:. :. :.:** *.*****:* :*:** ** . *. :. * * :* * |     |
| AtCaM1 | EVEEMIREADVDDGQGINYEYEFVKIMMAK--                                | 149 |
| AtCML9 | EAEHVMVREADLDGDFLSFHEFSKMMIAASY                                 | 151 |
|        | *.*.*.*****:.* ** *:*:*                                         |     |

**Sequence comparison of calmodulins derived from *A. thaliana* and *B. distachyon*.** The CaM 1, CaM3 and CaM7 alignments are shown in figure 1A, B and C, respectively. D is the alignment of CaM1 and the calmodulin-like protein 9 (CML9) derived from *A. thaliana*.

## Supplementary Methods

### Specific primers used in site-directed mutagenesis

- *BDPDE1*<sup>L124E</sup> (forward)

5' - GCGGACGCGGCGCGCGTGGGC -3'

- *BDPDE1*<sup>L124E</sup> (reverse)

5' - GCCCACGCGCGCCGCGTCCGC -3'

- *BDPDE1*<sup>H155G</sup> (forward)

5' - TAATCCCCGATGTCGCCCAGCAGAGCAGCCAG -3'

- *BDPDE1*<sup>H155G</sup> (reverse)

5' - CTGGCTGCTCTGCTGGGCGACATCGGGGATTA -3'

- *BDPDE1*<sup>D156G</sup> (forward)

5' - CCTTGGTATACTTGTAACCCCCGATGTCGTGCAGC-3'

- *BDPDE1*<sup>D156G</sup> (reverse)

5' - GCTGCACGACATCGGGGGTTACAAGTATACCAAGG-3'

- *BDPDE1*<sup>Y237E</sup> (forward)

5' - TTCTTGCTCCCTCCTTCTGTAAAACATCTTGCAACACCAATTGC-3'

- *BDPDE1*<sup>Y237E</sup> (reverse)

5' - GCAATTGGTGTTGCAAGATGTTTTACAGAAGGAGGGAGCAAGAA-3'

- *BDPDE1*<sup>L52K</sup> (forward)

5' - CGCTTCGTCGGACTCGAAGTTTACGATTCTCGATCTCCCTA-3'

- *BDPDE1*<sup>L52K</sup> (reverse)

5' - TAGGGAGATCGAGAATCGTAAACTTCGAGTCCGACGAAGCG-3'

## Supplementary Table S1

List of *B. distachyon* candidate PDEs

Search pattern [AYFW] H x [LEYFW] R x {20,40} [HRK] [DE] x {60,90} R x {3} [YFW]  
 Dataset searched *Brachypodium distachyon* proteome ID UP000008810

| Gene ID    | Region  | Hit pattern                                                                                                                                   | Description                              |
|------------|---------|-----------------------------------------------------------------------------------------------------------------------------------------------|------------------------------------------|
| A0A0Q3H5X5 | 353-481 | FHMWRMVSVNQSYGYGQQLRSIPSQPHCHLRF<br>VDITGFYGGKQDQLELALHILRNAAMLEAMKID<br>PKPSIAAEYQMQGPFFLDGYQVARDYVLRED<br>KCNVLYIKHVPRKTIEAKFLSGSLWSKLRTLSY | F-box domain<br>containing protein       |
| I1I25      | 295-417 | AHPERIQKL VKNYSQFVSFPIYTWQEKGTKEV<br>EVDEDPAAAKTEGDGDEKQAKKKTCTVVEK<br>YWDWELTNETQPIWLRNPREVSTEEYNEFYKK<br>TFNEYLDPLASSHFTTEGEVEFRSILY        | HATPase cdomain<br>containing protein    |
| I1H3Y3     | 127-237 | FHKERYNKDVKEKERLKTSAIVLRGGENKEV<br>RFK GKTEIKDLKV KADAITRLMERGYRVKCM<br>MPAGNEEEDLGGPLSRLGLIQDVCIVESGPHL<br>DSKHAYVIVRHVKF                    | IF3_N domain<br>containing protein       |
| I1ITQ2     | 526-630 | AHRYRHLITNDQLFRPVLDPQGWHDHIGFDGI<br>NFESSHELKRNISISSIAGQMRKDKEDMYIQSEC<br>SVSYTDQRGYSMLGGMDMQTASKDLVCTVHG<br>DAKYRNFPW                        | AIG1-type G domain<br>containing protein |
| I1GWH8     | 158-285 | AHQFRWLLSQVNYPKLGDLCLVIPCALTALD<br>HWSPDVKEQGVVSFMHIAKNVKVTELSLYED<br>AILDACCNYIPADDDLWYHIVEVSVLLLTCTQR<br>SNPRSPWYDRMLSAMLGHLERQLNQKRRIW     | Uncharacterized<br>protein               |
| A0A0Q3GZJ1 | 142-262 | FHQLRSGTSSSVSSQDGDSNERSTDDETEKEEV<br>NADNEHDEEGVKVVAWSADDQKNILKIGCLEI<br>ERNQRLEMLIARHRVRKDVDRNLIDFGSGDSIP<br>TVEELSKFNVQIPTVFAPRRNPF         | Uncharacterized<br>protein               |
| I1H012     | 2-108   | AHEWRRAAASASAAALDAAEDALFVDIAHEA<br>PLSCQRQSQSI VGGTLYCILLAGYAGVAIAAPW<br>IFVLIPEMTLPLLCSCNVLLIVTGIFQQYWVHQ<br>VTKVRLQGY                       | Uncharacterized<br>protein               |
| A0A2K2DUJ7 | 168-289 | AHRLRPPRRVTALVPLDALDAEKLYRRRFARD<br>VEFFPTDIGAVLGNTLSLGTFLAVVVGAEADASK<br>KFEWRGVEQFLASPPASWAVASLWDCGGVFR<br>LEMRGASRARRALAAASRALDRAAKW       | N-acetyltransferase<br>domain protein    |
| A0A0Q3GP66 | 245-353 | AHEWRYVVENQCMLWEQRDGEGVVPPEGRV<br>GRHERPVQVAGAGQLLPKPPKLPGGVQGGQLG<br>AAAGHARRLP RRRREPMGELRRRRFLQKKRW<br>RRRGGGHRQGQRRAGLW                   | PLCXc domain<br>containing protein       |
| A0A0Q3GWX6 | 103-215 | AHSLRGFEAIDTAKAALELACPGVVSCADVLA<br>FAARDASYILSVGNYPNIEFAMPGGRLDGRRS<br>MAEDTLHGSLPSASANVTELVD AFQTKGLGVE<br>DLVVLGAHSARCSFF                  | Peroxidase                               |

|                          |         |                                                                                                                                            |                                         |
|--------------------------|---------|--------------------------------------------------------------------------------------------------------------------------------------------|-----------------------------------------|
| A0A0Q3FAV4               | 121-233 | AHRWRDAAAAAPSSCPASSTAAIGGGILPPTTA<br>SLARRETPPPPPRPPTGASPPAPSTAAASFPSA<br>WRRPCDGGSGEARVLRRQLRGQQAWSAPWTA<br>TAPLPAVHSSRVYKY               | Uncharacterized<br>protein              |
| I1IA86                   | 215-329 | AHVYRSRDFKTKWRAKHPLHSALTGMWECPD<br>FFPVHEAGVQNGLETSQFAAKYVLKNSLDLTR<br>YDYYTVGTYNKTDTRYVPDDANGDYRRLQY<br>DYGNFYASKTFYDPAKQRRVLF            | Uncharacterized<br>protein              |
| A0A0Q3FTD3               | 265-383 | WHEERCVRASNITIDARMLEVSGLPCRPPPRDH<br>SNDEAAAQAQQQLEFHNLSMCQPALCPNGED<br>DVVYLLAREKYLHPKAWCLA VDMKNQGTLK<br>HVAYIGNQGHFPCHRIFCLSRISKY       | DUF1618 domain<br>containing protein    |
| A0A0Q3IC40               | 279-394 | AHTWRAVSRARRLPPTTEETTYTVLVGCRDRVK<br>GVPRDYAGNAVVRATARSTAGEILGHGLGWT<br>ARLLNRAVASSGDEAAVRGFLGRWAREPRFA<br>YLAGFWNPAMVVTGNSPRFDAF          | Uncharacterized<br>protein              |
| I1J2V7                   | 33-148  | WHAERAASSAAQPASGTRSQYNVELESVNRFL<br>DGILREKPARFTAENLREFTGGYAERVGSGGFG<br>VVYRGRFPNGVAVAVKVLNGTLDRRAEEQFM<br>AEVGTAGRTYHINLVRLYGF           | Protein kinase<br>domain protein        |
| I1HF09                   | 665-781 | FHLRRGPLLSIVGHEDERSVLRNLFLNASFDL<br>SLRMLAPRCIMHREGGTFEELPAYDLAMQSYS<br>AVVLDHGTDFIWLGAELATKEGQSAAALAAC<br>RTLAEELSELRFAPRILSF             | Protein transport<br>SEC23              |
| I1GRD2                   | 66-193  | AHALRRPIEVLLYTRPVHGCGEEDLGLDALAV<br>VSGSGDRDRRRRLASIPAMPHRCGPRPCCCLA<br>SCDGLLLLGHGRGNFQPYASYLVCNPATRQW<br>TQLPRVTAEFAAAGKRPGHGPARELFRESGF | F-box domain<br>containing protein      |
| I1HUJ6                   | 662-778 | AHTLRFEAYELPKPSLPTATSQTSISLPTDLVP<br>VPEQSYKKDDHQMSRPQPSGNALSGEFGTKLR<br>LDGVQKKWGRESYSSSSTPSSSTSSQQAANGST<br>NSDGGGLVSSQARESSY            | AP4 complex subunit<br>epsilon          |
| <b><u>A0A0Q3LY42</u></b> | 121-237 | AHALRVRDLALSAAEQGLSSPDRLLLIVELAAL<br>LHDIGDYKYTKDNMEDMSIVERFLQDVGLEKG<br>QREEIVSIITGMGFKNEVSGKAAEPTLEFAVVQ<br>DADRLDAIGAIGVARCFTY          | BdPDE1, HD domain<br>containing protein |
| A0A0Q3GTT5               | 173-293 | AHLFRSWATFLNRSIILTPEGDRTDKRGISAFNT<br>WKDIIIPGNVDDSMVKPDARAVQPIPLTKRKYL<br>ANFLGRAQKGAGRLKLVELAKQYPDKLESPEL<br>KLSGPDKLGRIDYFKHLRNAKF      | Exostosin domain<br>containing protein  |
| I1GZC4                   | 244-351 | FHPERGSSTADLADDSRFIEFYNLVFMQYNKK<br>DDGSLEPLKQKNIDTGMGLERMARILQNVNPN<br>YETDLIFPIIKKAASMALVSYSTADDTMKTNLK<br>IIGDHMRVAVVY                  | Probable alanine<br>tRNA ligase         |
| I1HR05                   | 55-164  | AHYRRRCRIRAPCCNEIFDCRHCHNEAKNSIGI<br>DTMRRHEIPRHEVQQQVICSLCGTEQEVRIQIC<br>NCGVCMGKYFCEVCKLFDDDDVSKQYHCHGC<br>GICRIGGRENFF                  | Uncharacterized<br>protein              |

|            |         |                                                                                                                                                 |                             |
|------------|---------|-------------------------------------------------------------------------------------------------------------------------------------------------|-----------------------------|
| A0A2K2CIP6 | 381-510 | WHVWRSQIHNNNNGGFDFAWLDAAFLFY<br>DEEARLVVRVRDCLDMASLGAYQEVPLPW<br>LDARPTKPASPGTPARALDALPATLDKTVRVA<br>VARPRASRSAKEKEEQEEVVVVEGIQVSDCSRF<br>VKF   | Uncharacterized<br>protein  |
| A0A2K2D3H0 | 58-190  | FHHFRALISFDSISSIKSQLENGSAKPNWTQSSPP<br>RPRDHHDLRHSSVLRLLLLRRRRTARPHSRAPLP<br>GVPDYPRRKFAFGCIRGTMLFMKKPFSLEPP<br>KDLPKEKVFQIRFTKEIFLDYQEYVKRLNLY | Uncharacterized<br>protein  |
| I1IFT6     | 227-338 | FHALRNTRGLPWPKEHEKKSDADLLDWLQAM<br>FGFQTDSVSNQREHLILLANMHIRQISKPDQQ<br>SKLDDGALDKVMKKLFFKNYKRWCKYLGRKSS<br>LRLPTIQQEVQQRKLLY                    | 1,3-beta-<br>glucansynthase |
